# Supplementary material
Source: PubMed Central journal article supplement (PMC2644345)
Supplement: NIHMS82218-supplement-SUPPLEMENTARY.pdf [file NIHMS82218-supplement-SUPPLEMENTARY.pdf]

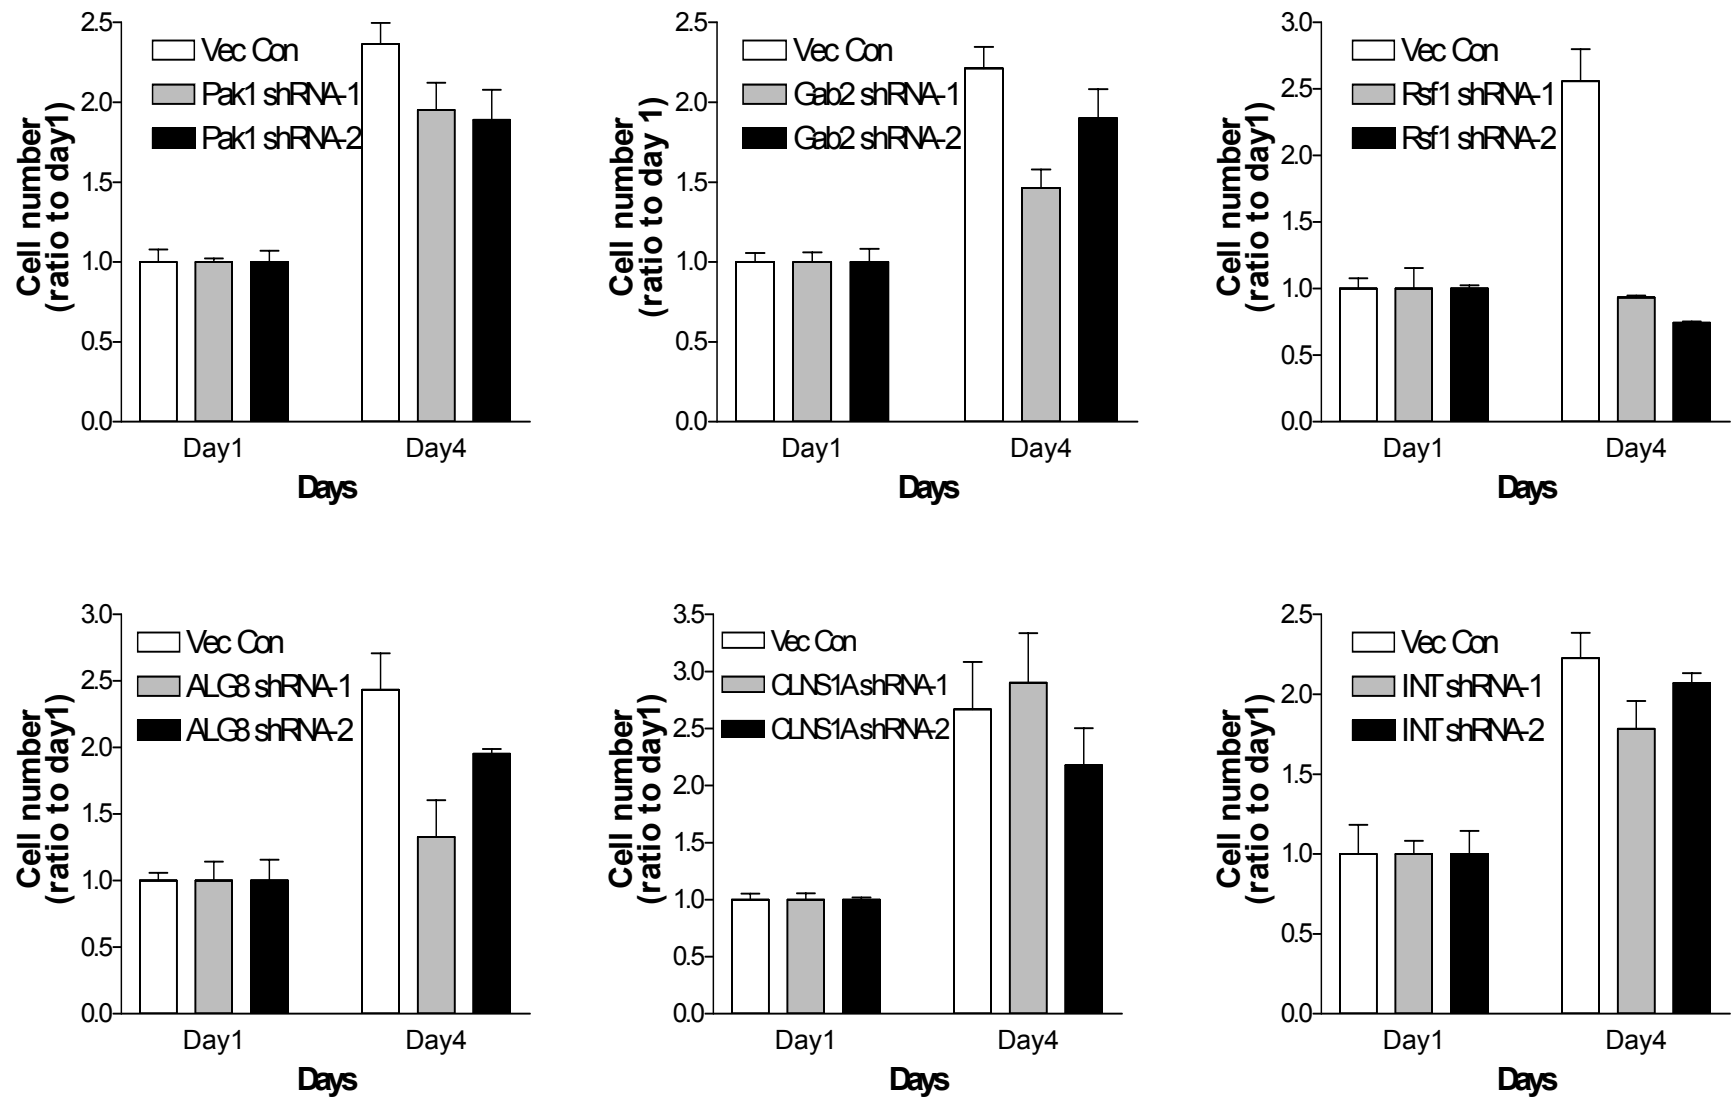

**Supplementary Fig. 1.** Effect of gene knockdown in Pak1, ALG8, Gab2, CLNS1A, INT, and Rsf-1 on cell growth in OVCAR3 cells. Cell number was measured at both day 1 and day 4 after shRNA transfection. Both shRNAs targeting Rsf-1 show the most remarkable growth inhibitory effects.

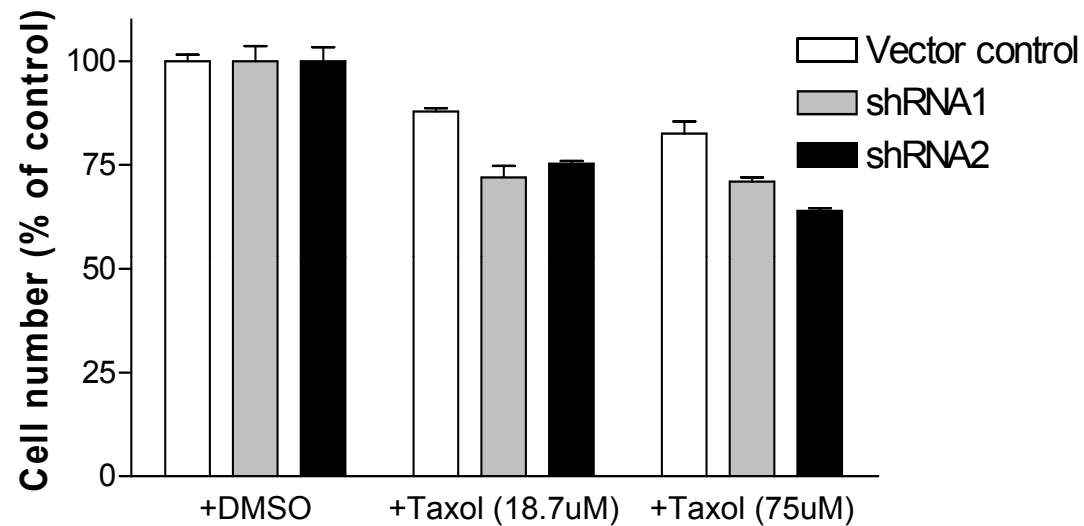

**Supplementary Fig. 2.** Effect of Rsf-1 shRNAs on paclitaxel sensitivity in paclitaxel-resistant SKOV3<sup>TR</sup> cells. The data (cell number) in paclitaxel treated groups was expressed as the percentage of control cells in medium containing DMSO (without paclitaxel).

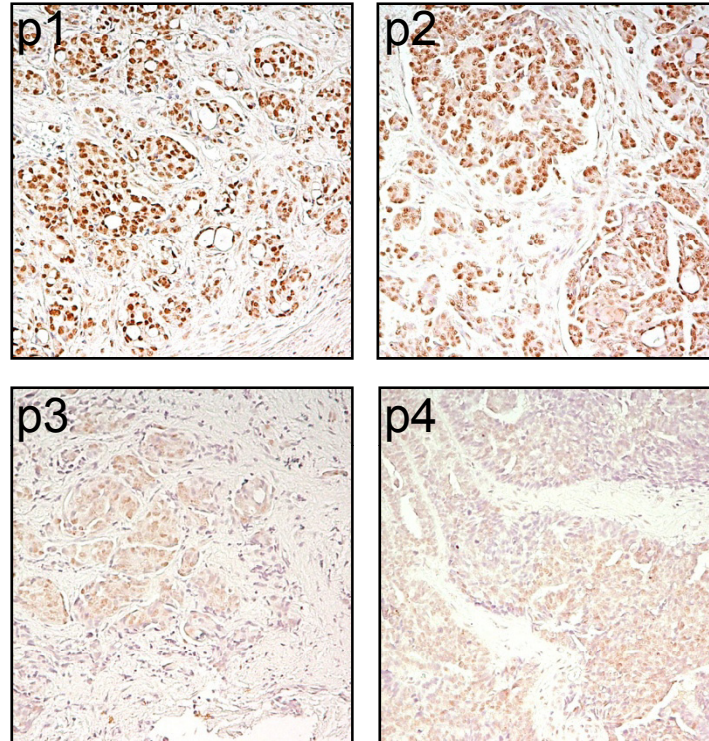

**Supplementary Fig. 3.** Intense Rsf-1 immunoreactivity is detected in two representative ovarian carcinoma tissues from patient 1 (p1) and patient 2 (p2) whose tumors showed extreme drug resistance to paclitaxel. In contrast, weak Rsf-1 immunointensity is observed in two representative tumors from the patient 3 (p3) and patient 4 (p4) whose tumors showed low drug resistance to paclitaxel.

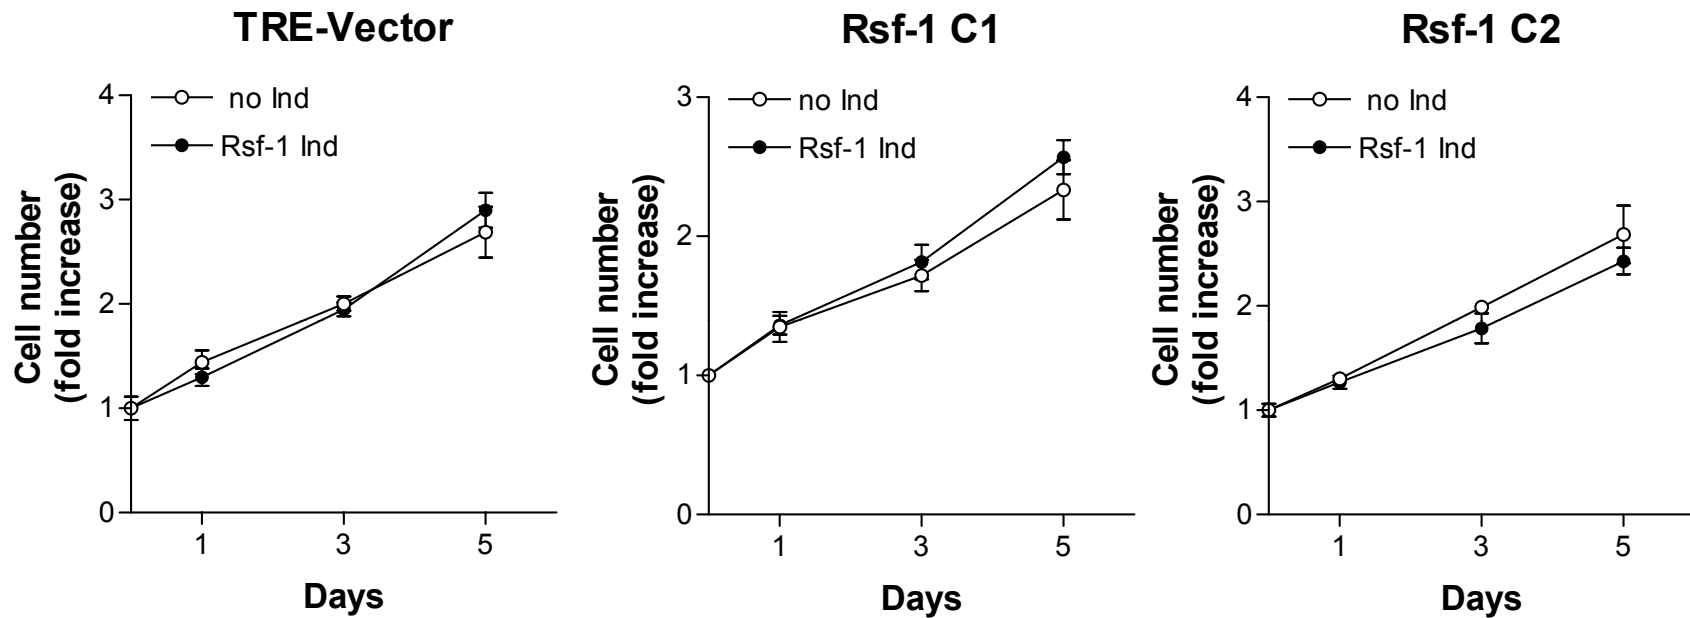

**Supplementary Fig. 4.** Effect of Rsf-1 expression on cell growth. The TRE-vector only control cells demonstrate a similar growth rate between mock induction (without doxycycline) group and non-induction (with doxycycline) group. Similarly, the growth curves between Rsf-1 induced and non-induced SKOV3 clones (C1 and C2) are close to each other and the two groups of cells show no statistically significant difference in cell proliferation.

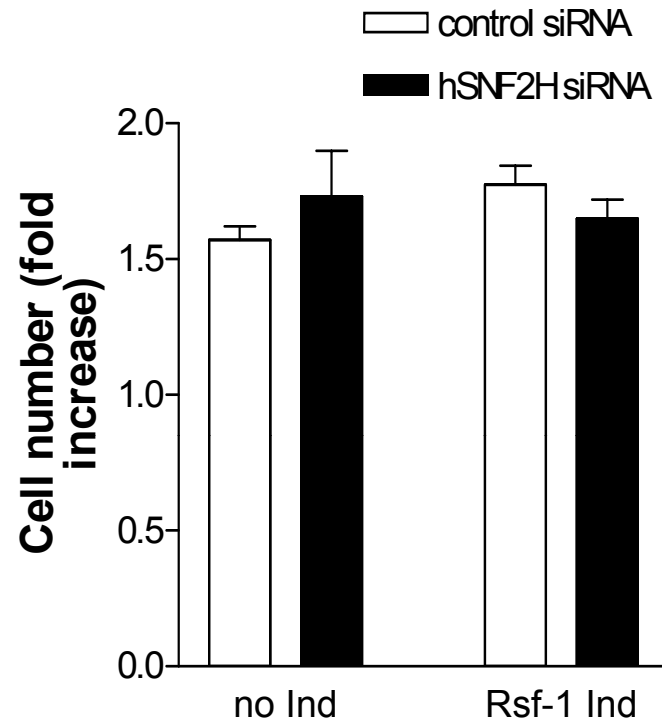

**Supplementary Fig. 5.** Effect of hSNF2H siRNA on cell growth in SKOV3 cells. hSNF2H siRNA does not have a significant effect on cell proliferation in either Rsf-1 induced or non-induced control SKOV3 cells.
